# Supplementary material
Source: PubMed Central journal article supplement (PMC11028229)
Supplement: 262_2019_2304_MOESM1_ESM.pdf [file 262_2019_2304_MOESM1_ESM.pdf]

**Supplementary Fig. 1**

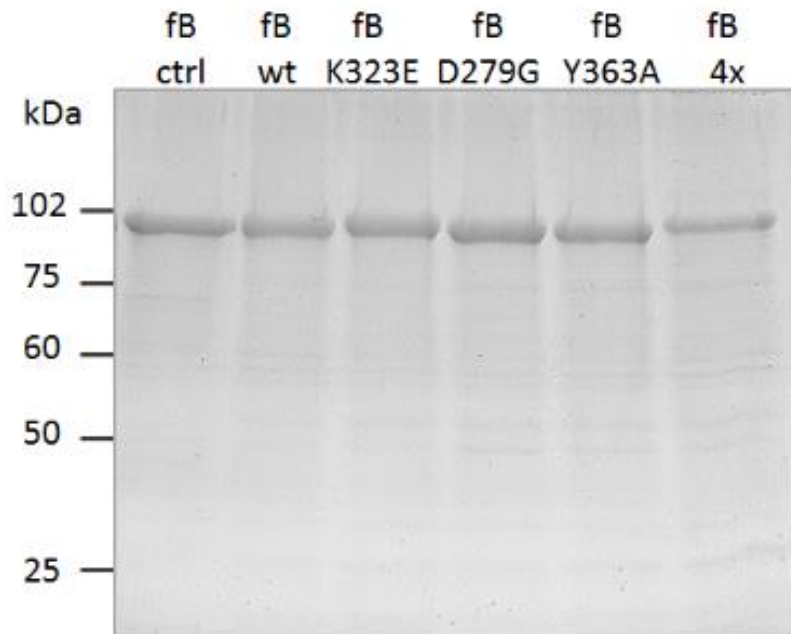

Plasma-purified FB (ctrl), recombinant wild type FB (wt), single (K323E, D279G, Y363A) and quadruple (4x) mutant proteins were electrophoresized on SDS-PAGE gel and stained with Commassie. Lanes were purposely overloaded with 10  $\mu\text{g}/\text{ml}$  of protein in order to visualize impurities.

Supplementary Fig. 2

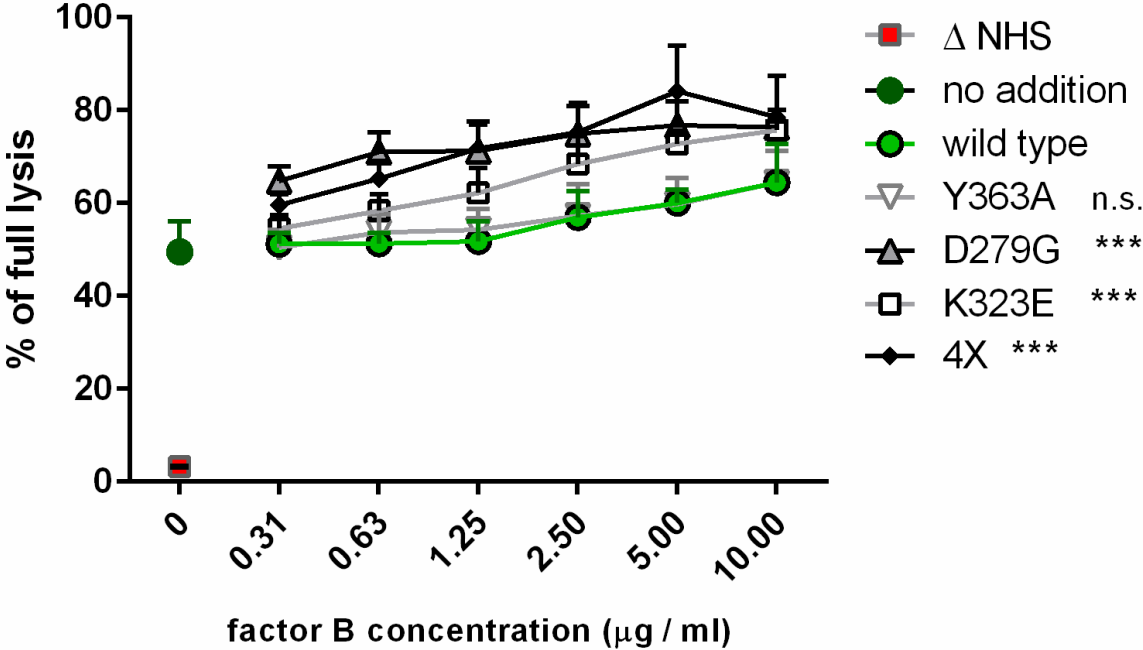

Addition of factor B augments hemolysis of sheep erythrocytes initiated by the classical complement pathway.

Sensitized sheep erythrocytes were mixed with 5% factor B-depleted serum supplemented with recombinant wild type factor B or its single (Y363A, D279G, K323E) or quadruple (4X: Y363A, D279G, K323E, F286L) mutants. Hemolysis was assessed after 30 minutes. The readout obtained for heat-inactivated normal human serum ( $\Delta$  NHS) represents background lysis. Dunnett’s multiple comparison test was applied for classification of differences between lytic curves of particular mutant compared to wild type factor B as: n.s. – not significant or \*\*\* - significant at p level < 0.001. Graph shows data from three independent experiments and error bars represent standard deviations.

Supplementary Fig. 3

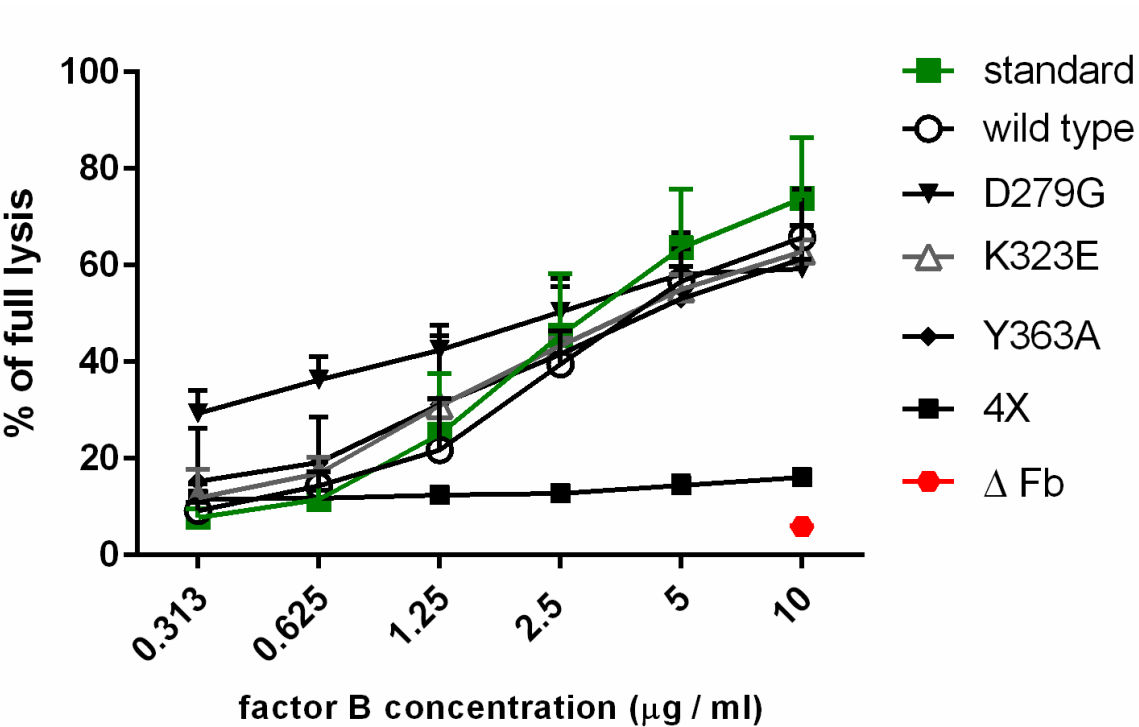

Hemolysis mediated by the alternative complement pathway.

Rabbit erythrocytes were incubated with 5% FB-depleted serum supplemented with increasing concentrations of recombinant wild type or mutated factor B. Plasma purified FB (Complement Technologies) was used as positive control (standard) and FB-depleted serum with no supplementation (Δ FB) served as negative control.

Supplementary Fig. 4

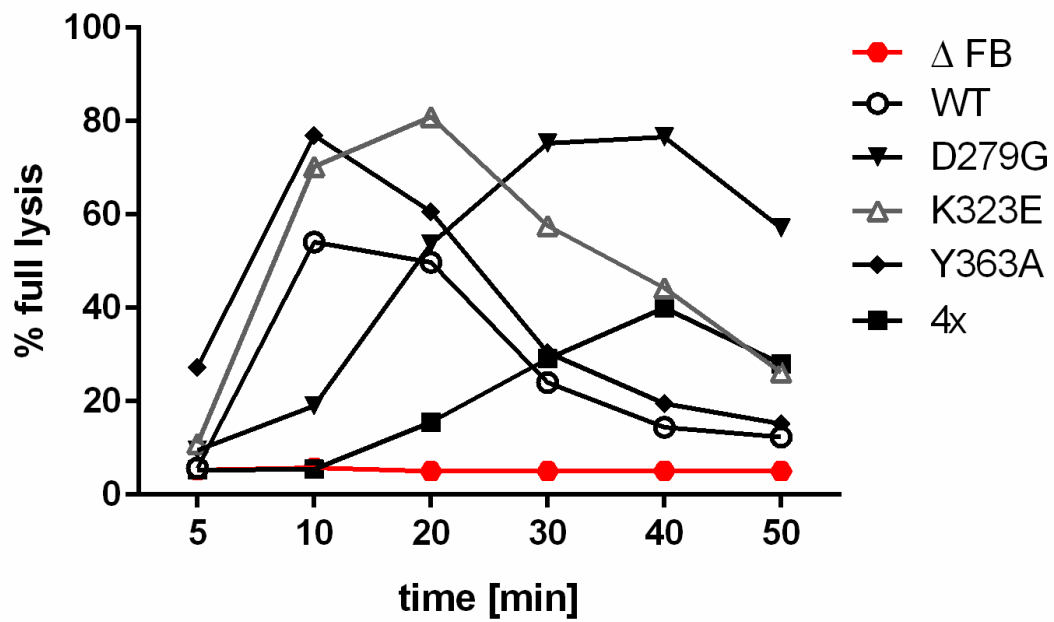

Convertase functional assay performed in FB-depleted serum

Single experiments showing convertase activity in 5% FB-depleted serum ( $\Delta$  FB) + / - recombinant wild type (WT) or mutated FB variants supplemented at final concentration of 10  $\mu$ g / ml.
